# Supplementary material for: Validity and reliability of a Malay version of the brief illness perception questionnaire for patients with type 2 diabetes mellitus
Source: PubMed Central journal article supplement (PMC5543429; doi:10.1186/s12874-017-0394-5), 2017-08-03
Supplement: 12874_2017_394_MOESM1_ESM.pdf [file 12874_2017_394_MOESM1_ESM.pdf]

## Soal Selidik Ringkas Persepsi Penyakit (MBIPQ) ©

| <b>Bil.</b> | <b>ARAHAN :</b> Bagi soalan-soalan berikut, sila bulatkan nombor yang paling sesuai dengan pandangan anda.                                                                                                                                                                                                                                                         |
|-------------|--------------------------------------------------------------------------------------------------------------------------------------------------------------------------------------------------------------------------------------------------------------------------------------------------------------------------------------------------------------------|
| 1.          | <p>Sejauh manakah diabetes anda menjejaskan kehidupan anda?</p> <p style="text-align: center;"> <b>0    1    2    3    4    5    6    7    8    9    10</b><br/>                     tidak menjejaskan langsung <span style="float: right;">menjejaskan kehidupan saya dengan teruk</span> </p>                                                                    |
| 2.          | <p>Pada pendapat anda, berapa lamakah diabetes anda akan berterusan?</p> <p style="text-align: center;"> <b>0    1    2    3    4    5    6    7    8    9    10</b><br/>                     tempoh yang amat pendek <span style="float: right;">selama-lamanya</span> </p>                                                                                       |
| 3.          | <p>Pada pendapat anda, sejauh manakah anda dapat mengawal diabetes anda?</p> <p style="text-align: center;"> <b>0    1    2    3    4    5    6    7    8    9    10</b><br/>                     tidak dalam kawalan saya sama sekali <span style="float: right;">dalam kawalan sepenuhnya saya</span> </p>                                                       |
| 4.          | <p>Pada pendapat anda, sejauh manakah rawatan anda membantu mengatasi diabetes anda?</p> <p style="text-align: center;"> <b>0    1    2    3    4    5    6    7    8    9    10</b><br/>                     tidak membantu langsung <span style="float: right;">amat membantu</span> </p>                                                                        |
| 5.          | <p>Sejauh manakah anda mengalami gejala akibat diabetes anda?</p> <p style="text-align: center;"> <b>0    1    2    3    4    5    6    7    8    9    10</b><br/>                     Tiada gejala langsung <span style="float: right;">banyak gejala yang teruk</span> </p>                                                                                      |
| 6.          | <p>Sejauh manakah anda risau tentang diabetes anda?</p> <p style="text-align: center;"> <b>0    1    2    3    4    5    6    7    8    9    10</b><br/>                     tidak risau langsung <span style="float: right;">amat risau</span> </p>                                                                                                               |
| 7.          | <p>Pada pendapat anda, sejauh manakah anda memahami diabetes anda?</p> <p style="text-align: center;"> <b>0    1    2    3    4    5    6    7    8    9    10</b><br/>                     tidak memahami langsung <span style="float: right;">memahami dengan sangat jelas</span> </p>                                                                           |
| 8.          | <p>Sejauh manakah diabetes anda menjejaskan anda secara emosi? (cth. adakah ia membuatkan anda marah, takut, kecewa atau murung?)</p> <p style="text-align: center;"> <b>0    1    2    3    4    5    6    7    8    9    10</b><br/>                     tidak terjejas langsung secara emosi <span style="float: right;">amat terjejas secara emosi</span> </p> |
| 9.          | <p>Sila senaraikan, tiga faktor paling penting mengikut susunan yang anda percaya telah menyebabkan diabetes anda. Sebab paling penting bagi saya:-</p> <p style="margin-left: 20px;"> <b>1.</b> _____<br/> <b>2.</b> _____<br/> <b>3.</b> _____                 </p>                                                                                              |

## The Brief Illness Perception Questionnaire (BIPQ)

|            |                                                                                                                                                                                                                                                                                                                                                                                |
|------------|--------------------------------------------------------------------------------------------------------------------------------------------------------------------------------------------------------------------------------------------------------------------------------------------------------------------------------------------------------------------------------|
| <b>No.</b> | For the following questions, please circle the number that best corresponds to your views:                                                                                                                                                                                                                                                                                     |
| 1.         | <p>How much does your diabetes affect your life?</p> <p style="text-align: center;"> <b>0</b>    <b>1</b>    <b>2</b>    <b>3</b>    <b>4</b>    <b>5</b>    <b>6</b>    <b>7</b>    <b>8</b>    <b>9</b>    <b>10</b><br/> no affect at all <span style="float: right;">severely affects my life</span> </p>                                                                  |
| 2.         | <p>How long do you think your diabetes will continue?</p> <p style="text-align: center;"> <b>0</b>    <b>1</b>    <b>2</b>    <b>3</b>    <b>4</b>    <b>5</b>    <b>6</b>    <b>7</b>    <b>8</b>    <b>9</b>    <b>10</b><br/> a very short time <span style="float: right;">forever</span> </p>                                                                             |
| 3.         | <p>How much control do you feel you have over your diabetes?</p> <p style="text-align: center;"> <b>0</b>    <b>1</b>    <b>2</b>    <b>3</b>    <b>4</b>    <b>5</b>    <b>6</b>    <b>7</b>    <b>8</b>    <b>9</b>    <b>10</b><br/> absolutely no control <span style="float: right;">extreme amount of control</span> </p>                                                |
| 4.         | <p>How much do you think your treatment can help your diabetes?</p> <p style="text-align: center;"> <b>0</b>    <b>1</b>    <b>2</b>    <b>3</b>    <b>4</b>    <b>5</b>    <b>6</b>    <b>7</b>    <b>8</b>    <b>9</b>    <b>10</b><br/> not at all <span style="float: right;">extremely helpful</span> </p>                                                                |
| 5.         | <p>How much do you experience symptoms from your diabetes?</p> <p style="text-align: center;"> <b>0</b>    <b>1</b>    <b>2</b>    <b>3</b>    <b>4</b>    <b>5</b>    <b>6</b>    <b>7</b>    <b>8</b>    <b>9</b>    <b>10</b><br/> no symptom at all <span style="float: right;">many severe symptoms</span> </p>                                                           |
| 6.         | <p>How concerned are you about your diabetes?</p> <p style="text-align: center;"> <b>0</b>    <b>1</b>    <b>2</b>    <b>3</b>    <b>4</b>    <b>5</b>    <b>6</b>    <b>7</b>    <b>8</b>    <b>9</b>    <b>10</b><br/> not at all concerned <span style="float: right;">extremely concerned</span> </p>                                                                      |
| 7.         | <p>How well do you feel you understand your diabetes?</p> <p style="text-align: center;"> <b>0</b>    <b>1</b>    <b>2</b>    <b>3</b>    <b>4</b>    <b>5</b>    <b>6</b>    <b>7</b>    <b>8</b>    <b>9</b>    <b>10</b><br/> don't understand at all <span style="float: right;">understand very clearly</span> </p>                                                       |
| 8.         | <p>How much does your diabetes affect you emotionally? (e.g. does it make you angry, scared, upset or depressed?)</p> <p style="text-align: center;"> <b>0</b>    <b>1</b>    <b>2</b>    <b>3</b>    <b>4</b>    <b>5</b>    <b>6</b>    <b>7</b>    <b>8</b>    <b>9</b>    <b>10</b><br/> no affect at all <span style="float: right;">severely affects my life</span> </p> |
| 9.         | <p>Please list in rank-order the three most important factors that you believe caused <u>your diabetes</u>. The most important causes for me:-</p> <p style="margin-left: 40px;"> <b>1.</b> _____<br/> <b>2.</b> _____<br/> <b>3.</b> _____ </p>                                                                                                                               |
